# Supplementary material for: Electrospun Nanofiber Membranes from 1,8-Naphthimide-Based Polymer/Poly(vinyl alcohol) for pH Fluorescence Sensing
Source: Molecules. 2022 Jan 14;27(2):520. doi: 10.3390/molecules27020520 (PMC8778194; doi:10.3390/molecules27020520)
Supplement: Supplementary file 1 [file molecules-27-00520-s001.zip › molecules-1539855-supplementary.pdf]

# Electrospun Nanofiber Membranes from 1,8-Naphthimide-Based Polymer/Poly(Vinyl Alcohol) for pH Fluorescence Sensing

Le Xu<sup>1</sup>, Xi Liu<sup>1,\*</sup>, Jiao Jia<sup>1</sup>, Hao Wu<sup>1</sup>, Juan Xie<sup>1</sup>, Yongtang Jia<sup>1,\*</sup>

<sup>1</sup> School of Textile Materials and Engineering, Guangdong Functional Fiber and Textile Engineering Technology Research Center, Guangdong-Hong Kong Joint Laboratory for New Textile Materials, Wuyi University, Jiangmen 529020, China

\* Correspondence: liuxi\_wyu@163.com; yongtjh@163.com

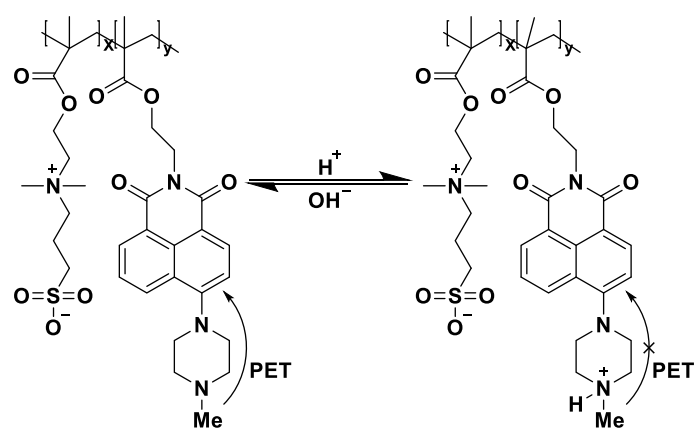

**Figure S1.** PNI-SBMA sensing mechanism for pH.

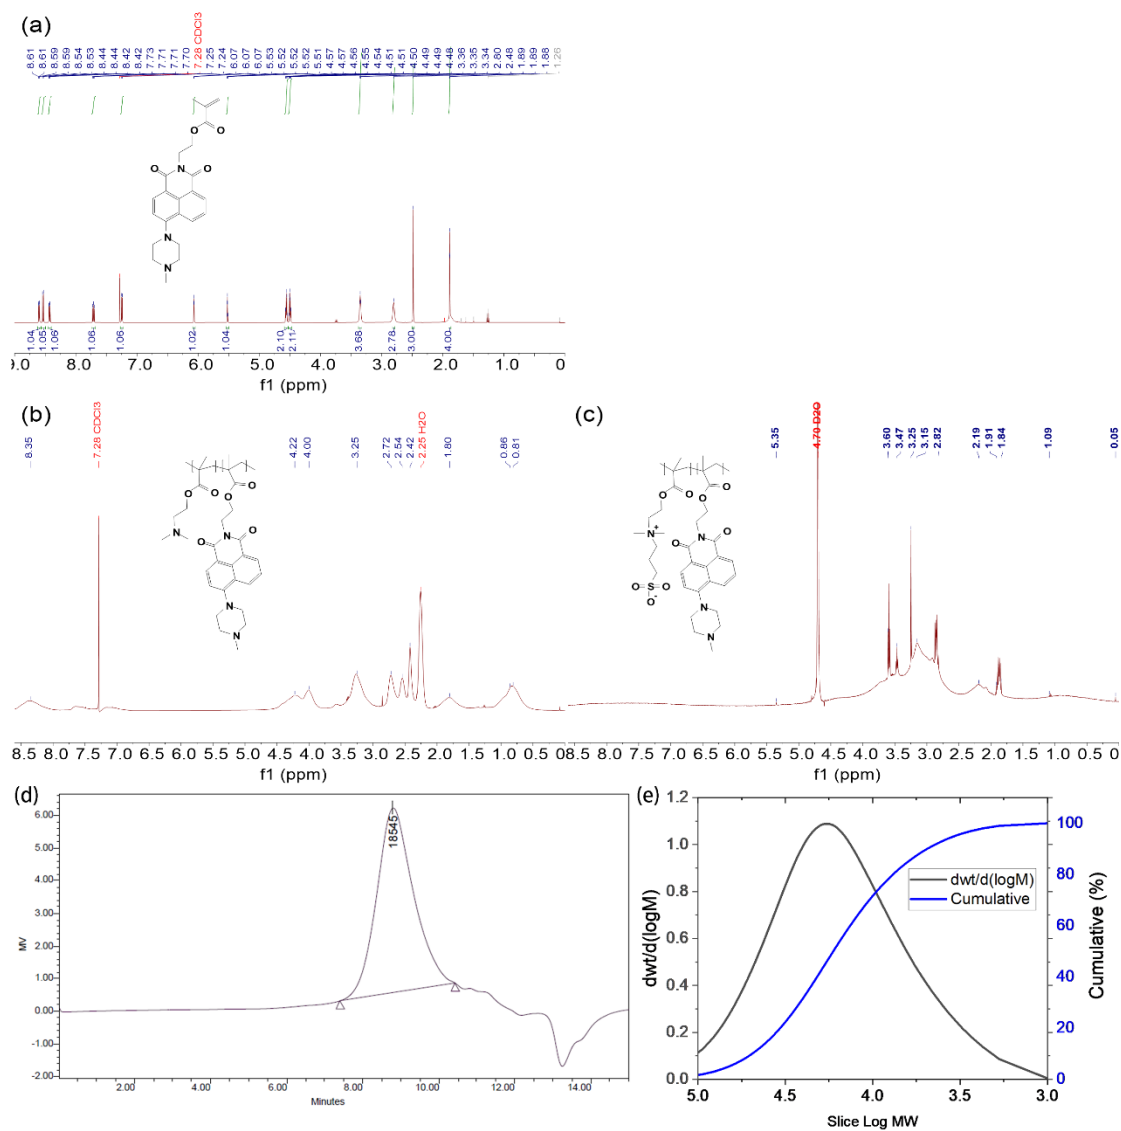

**Figure S2.**  $^1\text{H}$  NMR of NI (a), PNI-DM (b), and PNI-SBMA (c). The relative GPC chromatogram (d) and calibration chart (e) of PNI-SBMA.

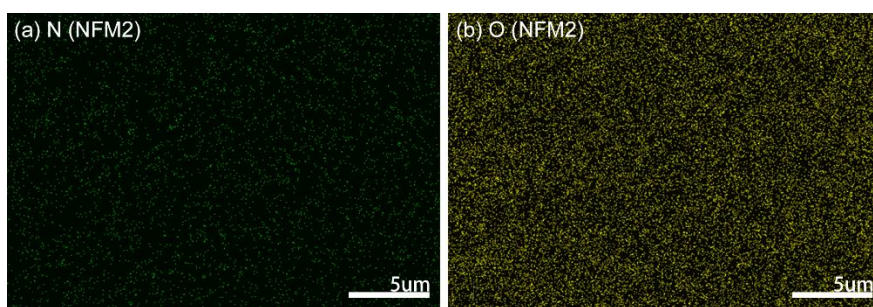

**Figure S3.** The EDS mapping spectrum of the (a) N and (b) O element.

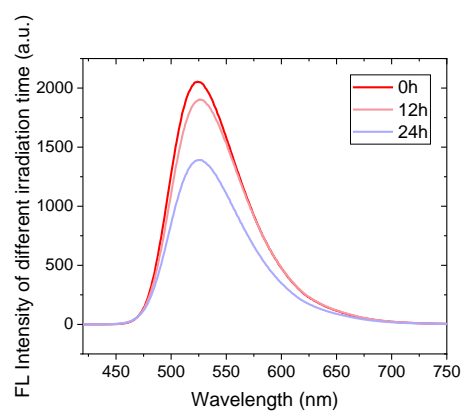

**Figure S4.** The photobleaching property of the fibers with xenon arc lamp.

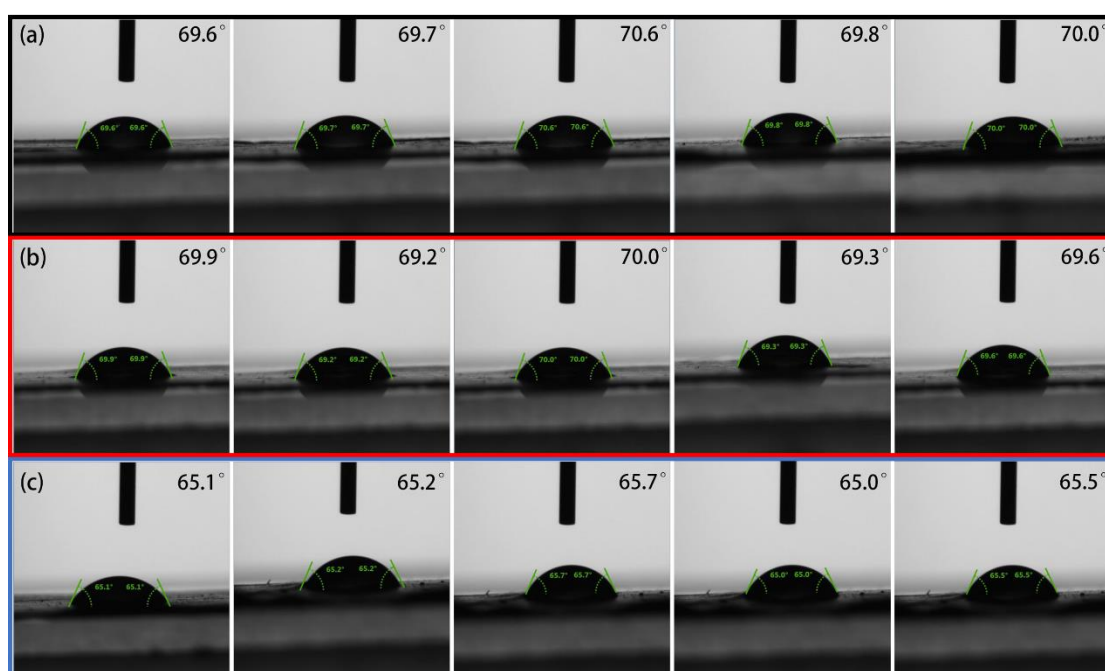

**Figure S5.** Water contact angle images of PNI-SBMA/PVA nanofiber membranes with different ratios (a) 1:14, (b) 1:9, (c) 1:4.

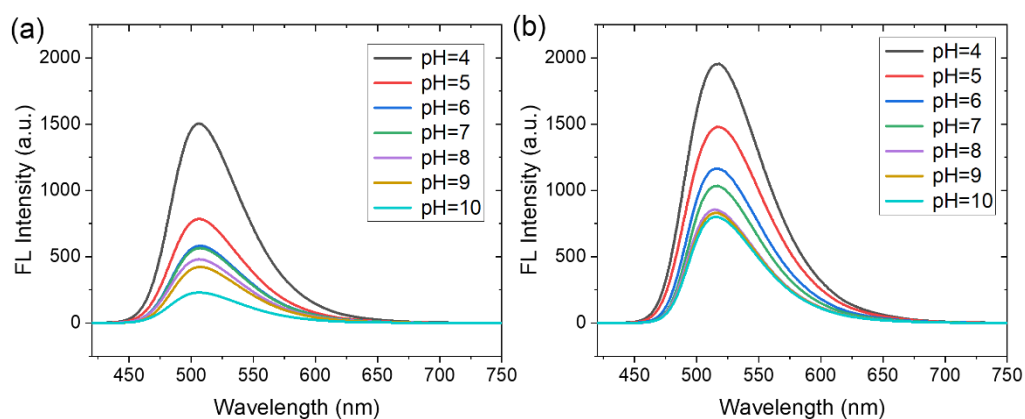

**Figure S6.** Fluorescence spectra of PNI-SBMA/PVA nanofiber membranes in different ratios (a) 1:14 (NFM1) and (b) 1:4 (NFM3) in a solution of pH = 4 – 10. It should be noted that, compared to NFM2, NFM1 and NFM3 also show similar fluorescence properties under different pH solutions.

**Table S1.** Molecular weights and molecular weight distribution of PNI-SBMA determined via GPC.

| Sample   | Mn    | Mw    | PDI (Mw/Mn) |
|----------|-------|-------|-------------|
| PNI-SBMA | 10539 | 23131 | 2.19        |
